# Supplementary material
Source: MDPI journal article supplement (https://www.mdpi.com/search?q=nanomaterials-11-00938)
Supplement: s001 [file nanomaterials-11-00938-s001.pdf]

## Supplementary Material

# Integration of an Aerosol-Assisted Deposition Technique for the Deposition of Functional Biomaterials Applied to the Fabrication of Miniaturised Ion Sensors

Antonio Ruiz-Gonzalez and Kwang-Leong Choy \*

Institute for Materials Discovery, Faculty of Mathematical & Physical Sciences,  
University College London, 107 Roberts Building, Malet Place, London WC1E 7JE, UK;  
a.gonzalez.16@ucl.ac.uk

\* Correspondence: k.choy@ucl.ac.uk

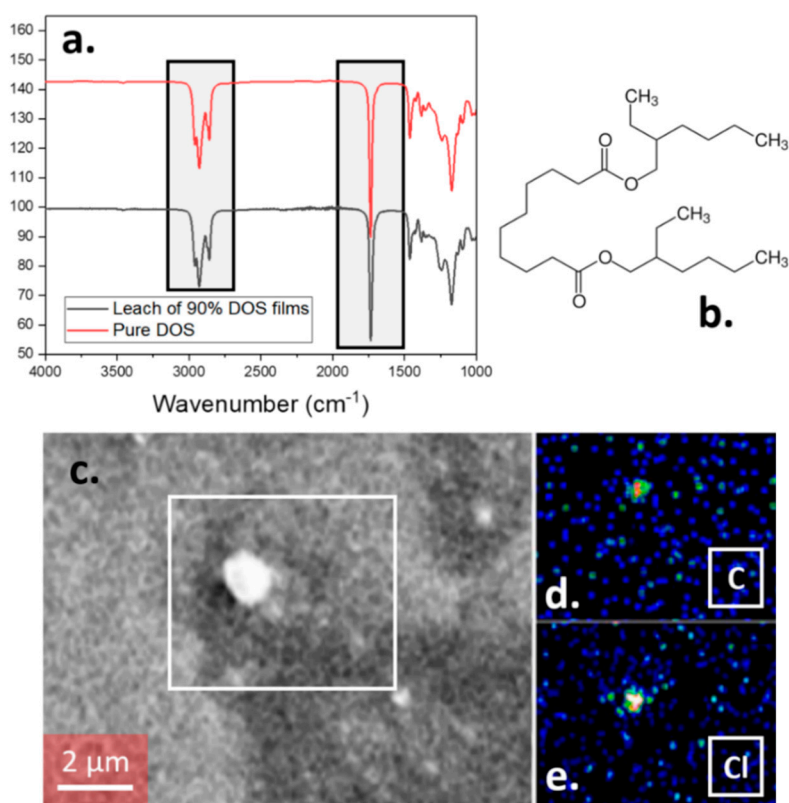

**Figure S1.** (a). Comparison of the FTIR spectrum of DOS plasticizer (red) and the leach exudate collected from a pure water sample after exposure to a 90% w.t.% plasticised PVC film (black). The observed peaks were consistent with the alkyl (1950–2850 cm<sup>-1</sup>) and ester (1730 cm<sup>-1</sup>) stretches. (b). Molecular structure of bis-(2-ethylhexyl) sebacate. (c). SEM visualisation of a PVC microparticle (1.2 μm wide) obtained from low-plasticized sensing film. The composition of such microparticle was determined by EDS, with a high content of (d) C and (e) Cl elements.
